# Supplementary material
Source: publisher figshare collection journal article supplement (https://springernature.figshare.com/ndownloader/files/14074019)
Supplement: Supplementary file [file 14074019]

**Additional file 5**

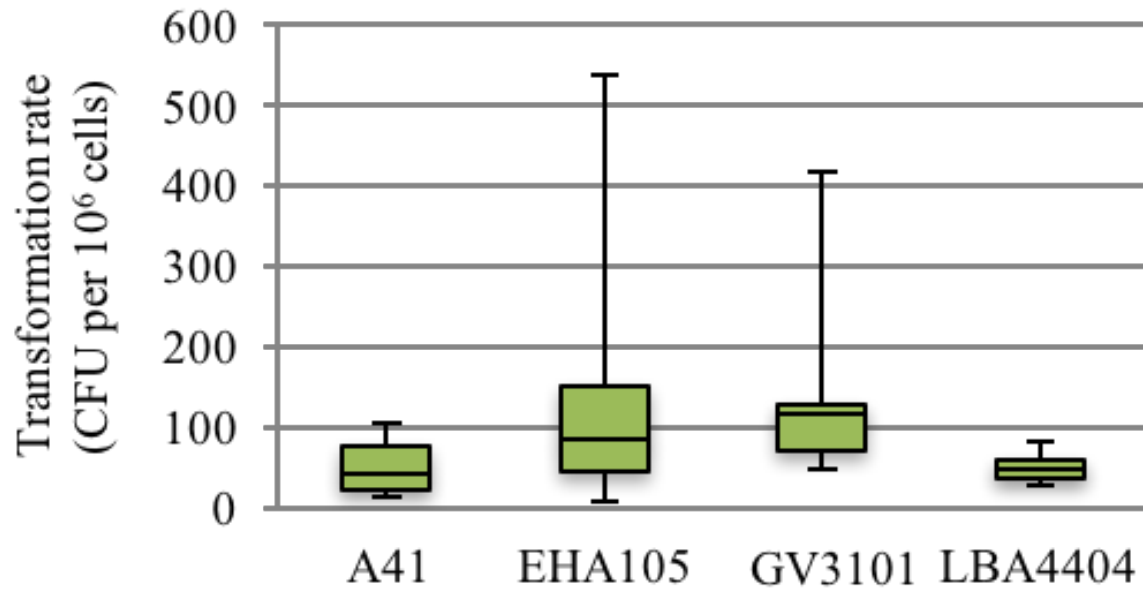

Additional file 5. Box plots represent transformation rates of the TISTR8447 using four *Agrobacterium* strains (n = 9).
